# Supplementary material for: Sonogenetics for noninvasive and cellular-level neuromodulation in rodent brain
Source: bioRxiv or medRxiv preprint supplement (doi:10.1101/2020.01.28.919910), 2020-01-28
Supplement: Supplementary file [file media-1.pdf]

**Sonogenetics for noninvasive and cellular-level neuromodulation in rodent brain**

Yaoheng Yang, Christopher Pham Pacia, Dezhuang Ye, Lifei Zhu, Hongchae Baek, Yimei Yue,

Jinyun Yuan, Mark J. Miller, Jianmin Cui, Joseph P. Culver,

Michael R. Bruchas, and Hong Chen

**Supplementary Information**

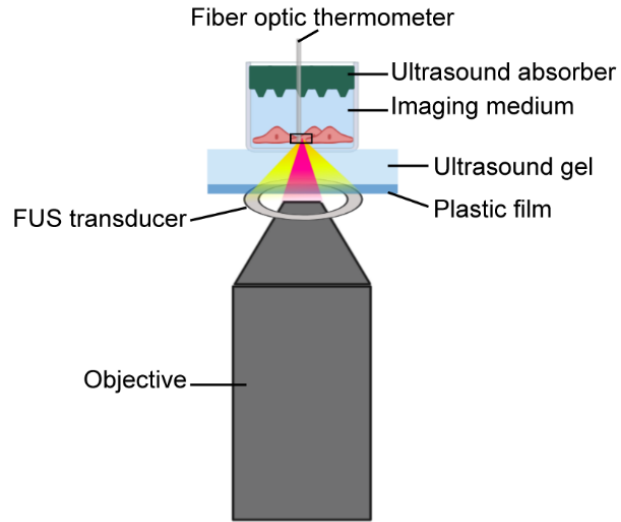

**Fig. S1. Illustration of the experimental setup for *in vitro* simultaneous FUS stimulation and  $\text{Ca}^{2+}$  fluorescence imaging.**

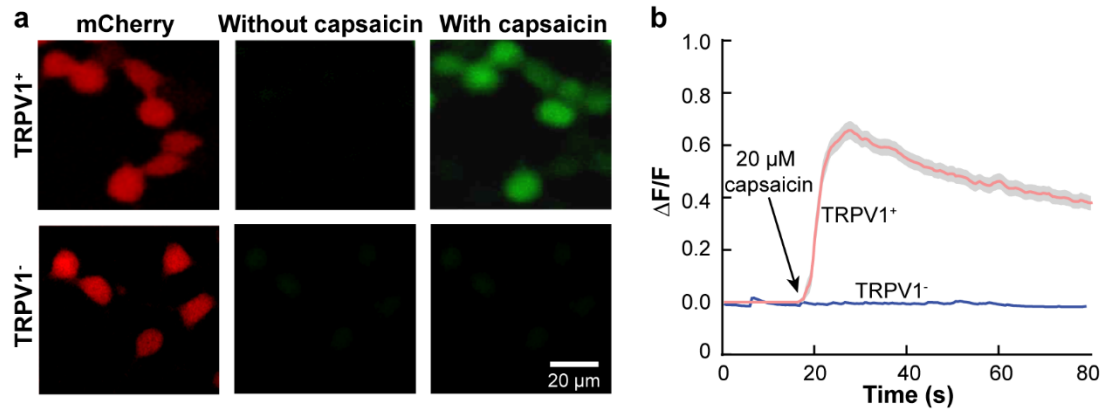

**Fig. S2. Functional assessment of TRPV1 ion channel expressed in HEK293T cells. (a)** Fluorescence images of HEK293T cells transduced with the pLenti-CamKII-TRPV1-p2A-mCherry (TRPV<sup>+</sup>) or pLenti-CaMKII-mCherry-WPRE (TRPV<sup>-</sup>). Capsaicin, a TRPV1 agonist, was added to test the functionality of TRPV1. **(b)** Ca<sup>2+</sup> fluorescence intensity change ( $\Delta F/F$ ) as a function of time. Shaded areas represent standard error of the mean and solid lines are the average intensity of 30 randomly selected cells.

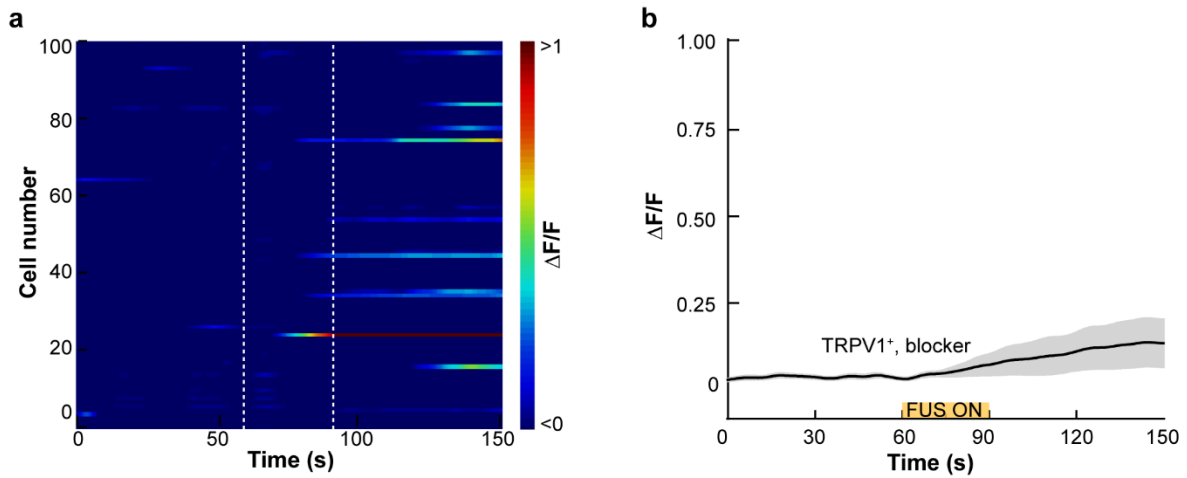

**Fig. S3. TRPV1 antagonist capsazepine reduces FUS-induced  $\text{Ca}^{2+}$  influx in TRPV1<sup>+</sup> HEK293T cell.** (a) Heat map of the  $\text{Ca}^{2+}$  fluorescence intensity of 100 automatically selected TRPV1<sup>+</sup> cells treated by adding 20  $\mu\text{M}$  capsazepine (TRPV1 antagonist) followed by FUS stimulation. (b) Fluorescence intensity as a function of time of the cells in (a) that responded to FUS stimulation. Shaded area indicates SEM and the solid line indicates the mean intensity.

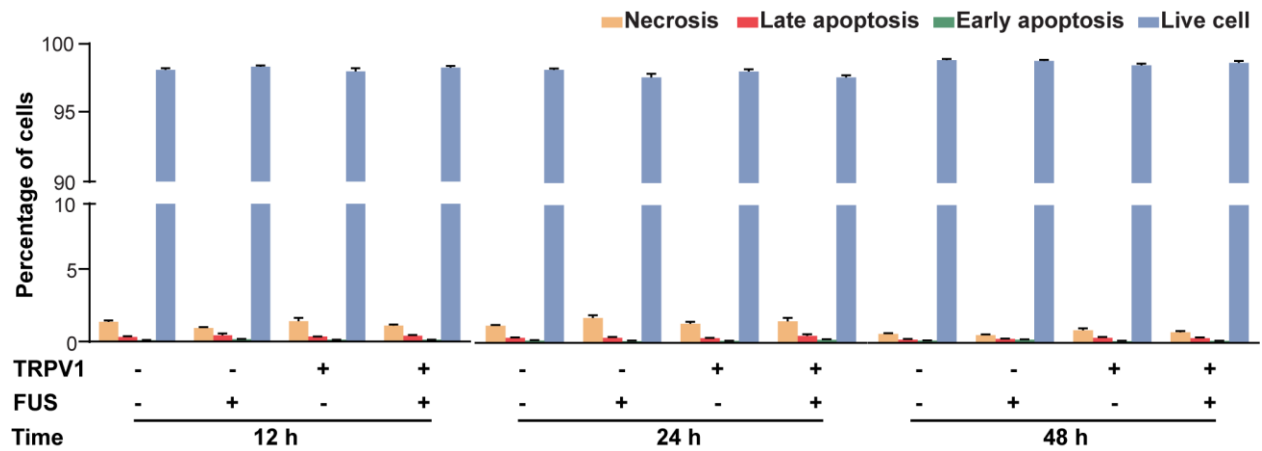

**Fig. S4. Evaluation of HEK293T cell viability after FUS stimulation.** The cells were labeled with Annexin V-FITC (AV) and propidium iodide (PI), and then measured by flow cytometry. Percentages of necrotic cells (AV-, PI+), early apoptotic cells (AV+, PI-), late apoptotic cells (AV+, PI+), and live cells (AV-, PI-) were measured at 12 h, 24 h and 48 h after FUS treatment. Error bars indicate SEM for 4 independent trials.

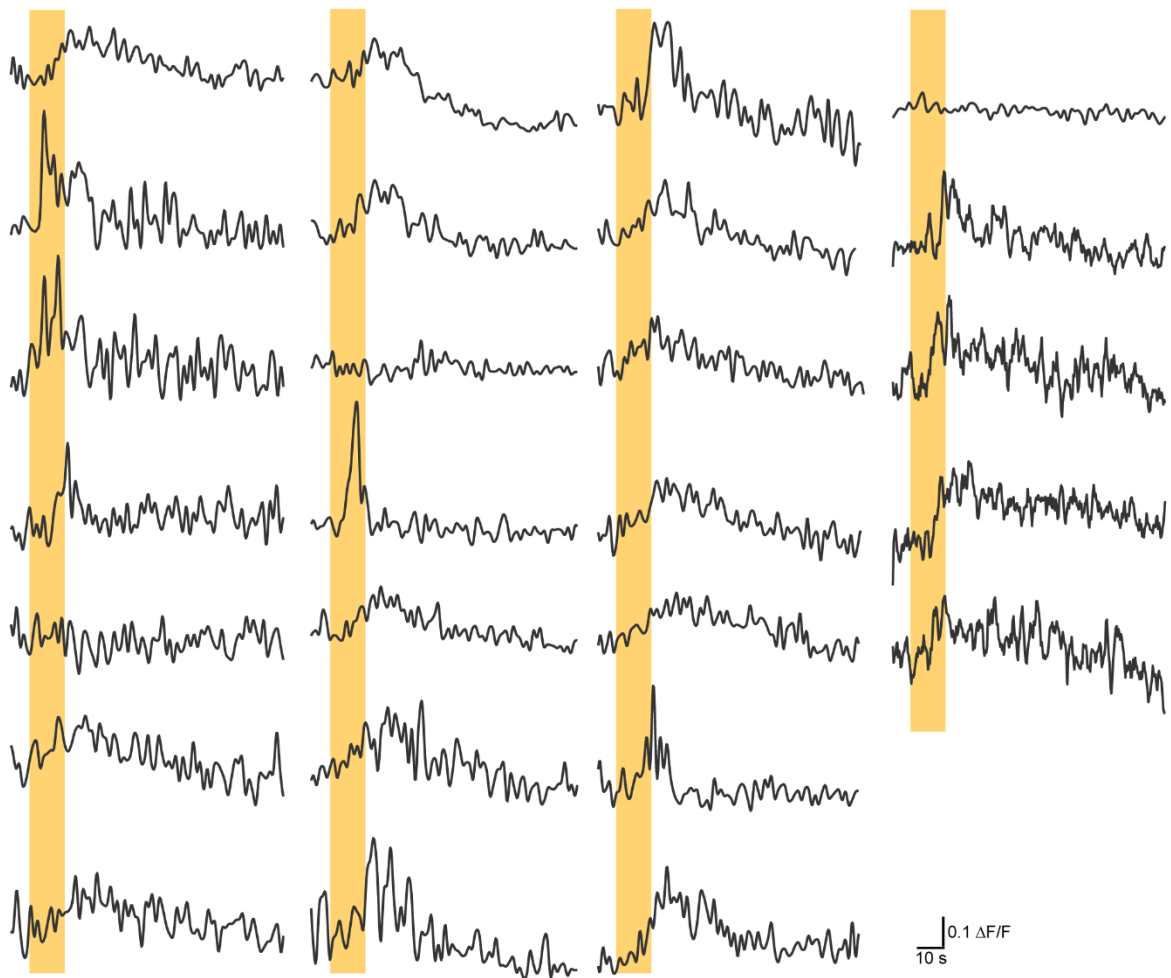

**Fig. S5.  $\text{Ca}^{2+}$  fluorescence intensity curves quantified based on in vivo two-photon microscopic imaging of 26 independent trials from 13 neurons in the mouse cortex. Yellow bars indicate the FUS stimulation time.**
